# Supplementary material for: Production and In Situ Modification of Bacterial Cellulose Gels in Raisin Side-Stream Extracts Using Nanostructures Carrying Thyme Oil: Their Physicochemical/Textural Characterization and Use as Antimicrobial Cheese Packaging
Source: MDPI journal article supplement (doi:10.3390/gels9110859), 2023-10-29
Supplement: s1 [file s1]

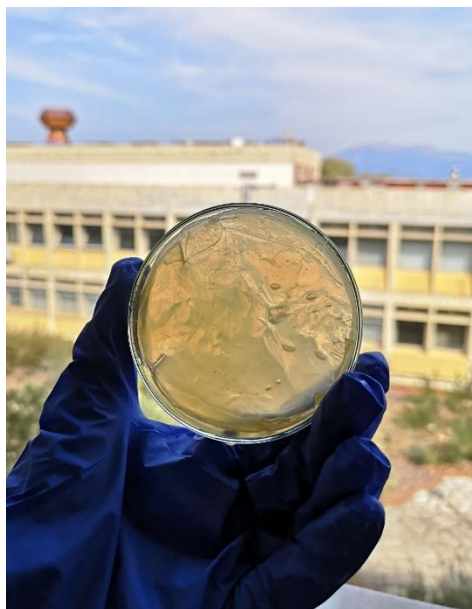

(a)

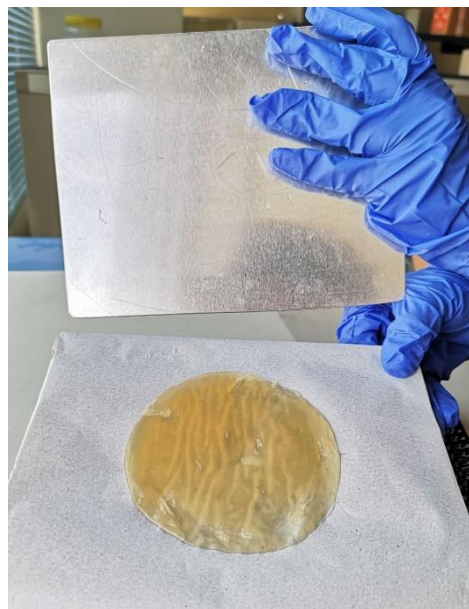

(b)

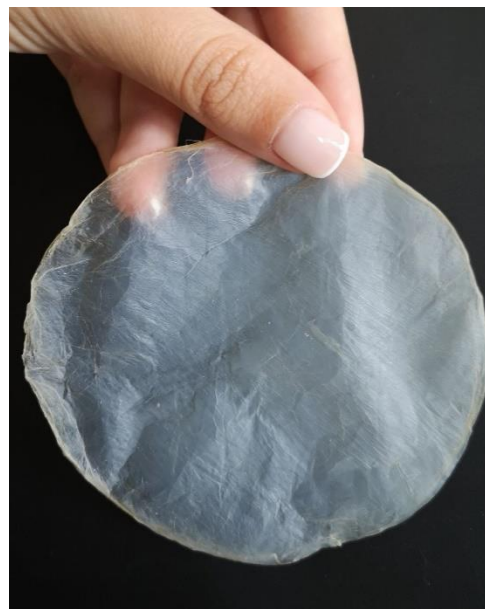

(c)

**Figure S1.** (a) Wet BC gel. (b) Preparation of BC gel for drying (pressed between metal plates covered with non-stick baking paper). (c) Dried BC film.

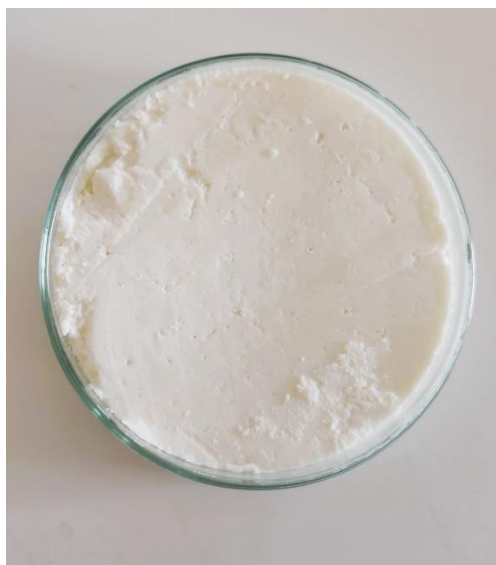

(a)

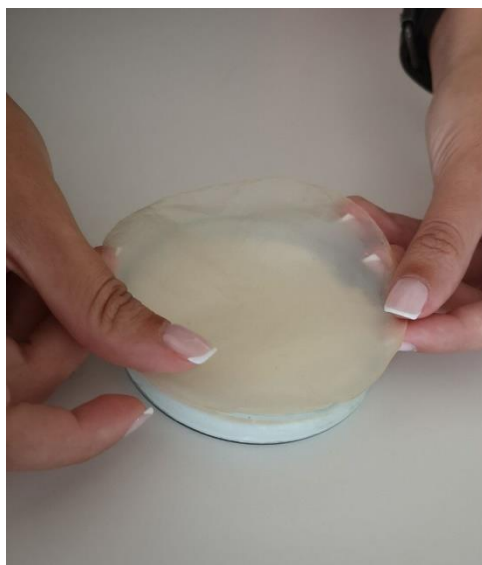

(b)

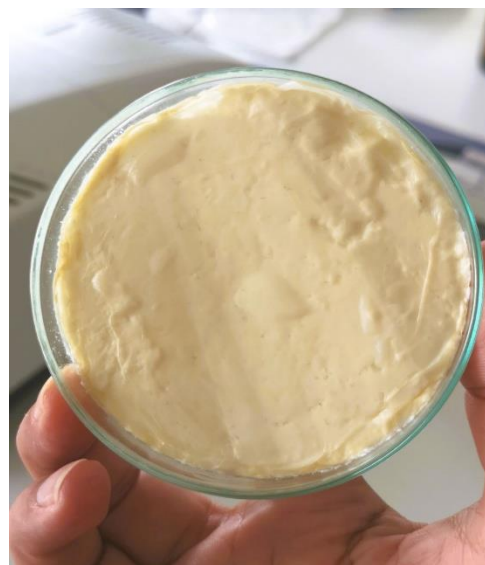

(c)

**Figure S2.** (a) White cheese. (b) Cheese surface covering with dried BC film. (c) Cheese covered with dried BC film after 2 months at 4 °C.
